# Supplementary material for: Developing an integrated intervention to co-manage diabetes and hypertension in China: an application of the Behaviour Change Wheel Framework
Source: Research Square preprint supplement (doi:10.21203/rs.3.rs-6467750/v1), 2025-08-06
Supplement: Supplementary file 1 [file b5748b1666d6bb9dbe5b5eaf.docx]

Table of Contents

[Medication Adherence _BCW Table 2](#_Toc190870948)

[**Table S1. Selection of the target behavior** 2](#_Toc190870949)

[**Table S2. Specification of the target behavior** 2](#_Toc190870950)

[**Table S3. Identification of drivers to achieve target behaviors using the COM-B model** 3](#_Toc190870951)

[**Table S4. Identification of the intervention functions based on the behavioral diagnosis arrived at in MA_Table S3** 4](#_Toc190870952)

[**Table S5. Identification of policy categories based on the intervention functions identified in MA_Table S4** 5](#_Toc190870953)

[**Table S6. Identification of BCTs based on the intervention functions identified in MA_Table S4** 7](#_Toc190870954)

[**Table S7. Outline of the intervention strategy based on the identified intervention functions, policy categories and BCTs for medical adherence.** 8](#_Toc190870955)

[Salt Reduction _BCW Table 11](#_Toc190870956)

[**Table S8. Selection of the target behavior** 11](#_Toc190870957)

[**Table S9. Specification of the target behavior** 12](#_Toc190870958)

[**Table S10. Identification of drivers to achieve target behaviors using the COM-B model** 13](#_Toc190870959)

[**Table S11. Identification of the intervention functions based on the behavioral diagnosis arrived at in SR_Table S10** 14](#_Toc190870960)

[**Table S12. Identification of policy categories based on the intervention functions identified in SR_Table S11** 15](#_Toc190870961)

[**Table S13. Identification of BCTs based on the intervention functions identified in SR_Table S11** 17](#_Toc190870962)

[**Table S14. Outline of the intervention strategy based on the identified intervention functions, policy categories and BCTs for salt reduction.** 18](#_Toc190870963)

[Physical Activity_BCW Table 23](#_Toc190870964)

[**Table S15. Selection of the target behavior** 23](#_Toc190870965)

[**Table S16. Specification of the target behavior** 24](#_Toc190870966)

[**Table S17. Identification of drivers to achieve target behaviors using the COM-B model** 25](#_Toc190870967)

[**Table S18. Identification of the intervention functions based on the behavioral diagnosis arrived at in PA_Table S17** 26](#_Toc190870968)

[**Table S19. Identification of policy categories based on the intervention functions identified in PA_Table S18** 27](#_Toc190870969)

[**Table S20. Identification of BCTs based on the intervention functions identified in PA_Table S18** 29](#_Toc190870970)

[**Table S21. Outline of the intervention strategy based on the identified intervention functions, policy categories and BCTs for physical activity.** 31](#_Toc190870971)

[Glossary of Technical Terms in BCW 37](#_Toc190870972)

## **Medication Adherence _BCW Table**

### **Table S1. Selection of the target behavior**

| **Potential target behaviors** | **Impact of behavior change** | **Likelihood of changing behavior** | **Spillover score** | **Measurement score** |
| --- | --- | --- | --- | --- |
| Take medication as prescribed daily | Very promising | Promising | Very promising | Promising |
| Refill prescriptions on time goals | Very promising | Promising | Unpromising but worth considering | Promising |
| Track and report side effects | Promising | Unpromising but worth considering | Promising | unacceptable |
| **Selected target behavior:** | Take medication as prescribed daily | | | |

Criteria for consider each potential target behaviors: unacceptable, unpromising but worth considering, promising, very promising

### **Table S2. Specification of the target behavior**

| **Target behavior** | Take medication as prescribed daily |
| --- | --- |
| ***Who* needs to perform the behavior?** | Elderly people with hypertension and diabetes in Kunshan |
| ***What* do they need to do differently to achieve the desired change?** | 1. Improve awareness of medication adherence benefits. 2. Develop a routine for consistent medication intake. |
| ***When* do they need to do it?** | Each day, as prescribed |
| ***Where* do they need to do it?** | At home or wherever they are |
| ***How often* do they need to do it?** | Daily, based on prescribed schedule |
| ***With whom* do they need to do it?** | Alone, but family members and healthcare providers can support |

### **Table S3. Identification of drivers to achieve target behaviors using the COM-B model**

| **COM-B Components** | **What needs to happen for the target behavior to occur?** | **Is there a need for change?** |
| --- | --- | --- |
| **Physical capability** | Ability to purchase medication and manage doses independently | No. |
| **Psychological capability** | Knowledge of the importance of adherence and strategies to overcome forgetfulness. | Yes |
| **Physical opportunity** | Consistent supply of medication at pharmacy or other health facilities | Yes |
| **Social opportunity** | Have family support to take medication prescribed. | Yes |
| **Reflective motivation** | Recognize the importance of medication adherence and willing to commit to habitual compliance. | Yes |
| **Automatic motivation** | Not applicable. | No |
| **Behavioral diagnosis of the relevant COM-B components:** | Psychological capability, physical opportunity, social opportunity, reflective motivation | |

### **Table S4. Identification of the intervention functions based on the behavioral diagnosis arrived at in MA_Table S3**

| **Candidate intervention functions** | **Does the intervention function meet the APEASE criteria (affordability, practicability, effectiveness/ cost-effectiveness, acceptability, side-effects/safety, equity)?** |
| --- | --- |
| **Education** | Yes. |
| **Persuasion** | Not acceptable |
| **Coercion** | Not acceptable |
| **Training** | Not practical due to the large scale needed |
| **Restriction** | Not acceptable |
| **Environmental restructuring** | Yes, integrating reminders like smart pillboxes and voice prompts for support |
| **Modelling** | Not acceptable |
| **Enablement** | Yes, enabling support through family or digital tools to help with reminders |
| **Selected intervention functions** | Education, environmental restructuring, enablement |

### **Table S5. Identification of policy categories based on the intervention functions identified in MA_Table S4**

| **Intervention function** | **Policy categories** | **Does the policy category meet the APEASE criteria (affordability, practicability, effectiveness/cost effectiveness, acceptability, side effects/safety, equity)?** |
| --- | --- | --- |
| **Education** | **Communication/ marketing** | Yes. Affordable through digital or printed materials, practical via community health workers or FP, and effective when combined with adherence reminders. |
| **Guidelines** | Not practicability with limited influence of current intervention |
| **Regulation** | Not practicability with limited influence of current intervention |
| **Legislation** | Not practicability with limited influence of current intervention |
| **Service provision** | Yes. Supported by the healthcare system; can be integrated into healthcare visits, offering cost-effective support for adherence. |
| **Environmental restructuring** | **Guidelines** | Not practicability with limited influence of current intervention |
| **Fiscal measures** | Not acceptable as the current regulation restricted the financial incentives provided to family physician |
| **Regulation** | Yes. high effectiveness and acceptability in structured healthcare settings. |
| **Legislation** | Not practicability with limited influence of current intervention |
| **Environmental/social planning** | Yes. Effective in supporting adherence for those with physical limitations, though potentially higher costs; broadly accessible. |
| **Enablement** | **Guidelines** | Not practicability with limited influence of current intervention |
| **Fiscal measures** | Not practicability with limited influence of current intervention |
| **Regulation** | Not practicability with limited influence of current intervention |
| **Environmental/social planning** | Yes. Varies by level of support (e.g., digital tools or family help), effective and acceptable for independent adherence support. |
| **Service provision** | Yes. Affordable through community programs; highly effective in supporting adherence with added assistance from providers. |

### **Table S6. Identification of BCTs based on the intervention functions identified in MA_Table S4**

| **Intervention function** | **Most relevant BCTs** | **Does the BCT meet the APEASE criteria (affordability, practicability, effectiveness/ cost-effectiveness, acceptability, side-effects/safety, equity)?** |
| --- | --- | --- |
| **Education** | **Information about health consequences** | Yes. Affordable, practical, effective for awareness; widely acceptable. |
| **Feedback on behavior** | Yes. Practical in clinics or with digital tools; reinforces adherence benefits. |
| **Prompts/cues** | Yes. Effective with voice bots, digital or family reminders; improves adherence. |
| **Environmental restructuring** | **Adding objects to the environment** | No. high cost for city-wise implementation |
| **Prompts/cues** | Yes. Affordable through devices (e.g., voice bots); supports adherence. |
| **Enablement** | **Social support (unspecified)** | Yes. Family/community help are highly practical and acceptable. |
| **Goal setting (behavior)** | Yes. Helps set health goals, motivating adherence; equitable and effective. |
| **Action planning** | Yes. Effective for consistent scheduling; supports adherence and widely accepted. |
| **Selected BCTs:** Information about health consequences, feedback on behavior, Prompts/cues, social support (unspecified), goal setting (behavior), action planning | | |

### **Table S7. Outline of the intervention strategy based on the identified intervention functions, policy categories and BCTs for medical adherence.**

| **Intervention functions** | **COM-B components served by intervention functions** | **BCTs to deliver intervention functions** | **Policy categories through which BCTs can be delivered** | **Intervention strategy** |
| --- | --- | --- | --- | --- |
| Education | Psychological capability, reflective motivation | Information about health consequences; Prompts/cues | Communication/marketing, Service provision | Use educational materials (e.g., posters, digital messages) to highlight benefits of adherence. Use reminders like voice bots for daily cues. |
| Feedback on behavior | Service provision | Provide regular feedback during check-ups on health improvements from adherence (e.g., blood pressure levels). |
| Environmental restructuring | Physical opportunity, social opportunity | Prompts/cues | Regulation  Environmental/social planning | Provide voice reminders to ensure timely medication. Establish work requirements for family physician to send voice messages reminders to the patients. |
| Enablement | Psychological capability, social opportunity | Social support (practical), Goal setting (outcome) | Service provision, Environmental/social planning | Engage family or health workers to assist with adherence. Set clear health goals (e.g., stable blood pressure) to motivate patients and track progress. |
| Action planning | Service provision | Collaborate with healthcare providers to create a medication schedule, improving adherence through structured plans and family involvement where possible. |

## **Salt Reduction _BCW Table**

### **Table S8. Selection of the target behavior**

| **Potential target behaviors** | **Impact of behavior change** | **Likelihood of changing behavior** | **Spillover score** | **Measurement score** |
| --- | --- | --- | --- | --- |
| Buy and use low sodium salt substitute (LSSSS) | Very promising | Promising | Worth considering | Worth considering |
| Assess average salt intake and set salt-reduction goals | Promising | worth considering | Very promising | Promising |
| Self-monitor salt use while cooking and use less than 5g of salt per day | Worth considering | Unpromising | Promising | Worth considering |
| Buy & use salt-reduced ingredients (e.g. low-sodium soy sauce, oyster sauce) | Worth considering | Worth considering | Worth considering | Worth considering |
| Avoid eating salty food or snacks | Worth considering | Unpromising | Worth considering | Unacceptable |
| Avoid dishes that are heavy in salt when dining outside | Worth considering | Unpromising | Worth considering | Unacceptable |
| **Selected target behavior** | Buy and use LSSS | | | |

Criteria for consider each potential target behaviors: unacceptable, unpromising but worth considering, promising, very promising

### **Table S9. Specification of the target behavior**

| **Target behavior** | Buy and use LSSS |
| --- | --- |
| ***Who* needs to perform the behavior?** | Elderly people (aged 65 or older) with hypertension and diabetes in Kunshan |
| ***What* do they need to do differently to achieve the desired change?** | 1. Understand the health benefits of LSSS 2. Reduce the doubts on LSSS/misunderstanding that LSSS is a type of nutrient supplements 3. Are willing to compromise the taste for health/find others way to add flavor to their meal 4. Know how to purchase or have family support to purchase LSSS (related to illiteracy) |
| ***When* do they need to do it?** | When the doctor recommends them to use LSSS |
| ***Where* do they need to do it?** | At supermarket (buying LSSS)  At home (use LSSS) |
| ***How often* do they need to do it?** | Every month (buying)  Every day (cooking) |
| ***With whom* do they need to do it?** | Anyone that they share meal with, can be by themselves  Anyone prepare daily meal for them, can be no one |

### **Table S10. Identification of drivers to achieve target behaviors using the COM-B model**

| **COM-B Components** | **What needs to happen for the target behavior to occur?** | **Is there a need for change?** |
| --- | --- | --- |
| **Physical capability** | Able to go to shopping and cook or have family support to do so | No |
| **Psychological capability** | Understand the health benefits of LSSS  Reduce the misunderstanding around LSSS  Can accurately select LSSS when shopping (related to illiteracy) | Yes |
| **Physical opportunity** | Have LSSS available in the market | No. |
| Have health professional inform whether LSSS is suitable for the person | Yes |
| **Social opportunity** | Have family support to purchase LSSS (related to illiteracy)  Have caregiver cook with LSSS | Yes |
| **Reflective motivation** | Willing to change current cooking/eating habits related to salt | Yes |
| **Automatic motivation** | Not applicable | No |
| **Behavioral diagnosis of the relevant COM-B components:** | Psychological capability, physical opportunity, social opportunity, reflective motivation | |

### **Table S11. Identification of the intervention functions based on the behavioral diagnosis arrived at in SR_Table S10**

| **Candidate intervention functions** | **Does the intervention function meet the APEASE criteria (affordability, practicability, effectiveness/ cost-effectiveness, acceptability, side-effects/safety, equity)?** |
| --- | --- |
| **Education** | Yes  Equity – considering illiteracy, this should be more than text-based education  Effectiveness – may not be very high if education is the sole ingredient of the intervention |
| **Persuasion** | No. Unlikely to be effective as elderly may misunderstood this as sale promotion. |
| **Incentivization** | Not applicable due to demands on resources |
| **Coercion** | Not acceptable |
| **Training** | Not practical as there are not sufficient resources to train all the elderly people in Kunshan. |
| **Restriction** | Not acceptable |
| **Environmental restructuring** | Yes. Through changes in family physician practices in primary care. |
| **Modelling** | No. Limited effectiveness and practicability as salt use happens in the household and it is hard to be observed by the peers. |
| **Enablement** | Yes. Enabling the elderly to be able to recognize & purchase LSSS |
| **Selected intervention functions** | Education, Environment restructuring, Enablement |

### **Table S12. Identification of policy categories based on the intervention functions identified in SR_Table S11**

| **Intervention function** | **Policy categories** | **Does the policy category meet the APEASE criteria (affordability, practicability, effectiveness/cost effectiveness, acceptability, side effects/safety, equity)?** |
| --- | --- | --- |
| **Education** | **Communication/ marketing** | Yes |
| **Guidelines** | Unlikely to change in our current study |
| **Regulation** | Yes – in terms of routine practice of family patient |
| **Legislation** | No |
| **Service provision** | Yes – by family physician team |
| **Environmental restructuring** | **Guidelines** | Unlikely to change in our current study |
| **Fiscal measures** | Not affordable |
| **Regulation** | Yes |
| **Legislation** | No |
| **Environmental/social planning** | Not practical because of the demand on resources |
| **Enablement** | **Guidelines** | Not practical |
| **Fiscal measures** | Unaffordable |
| **Regulation** | Not acceptable |
| **Legislation** | Not acceptable |
| **Environmental/social planning** | Yes – lifestyle medicine including figures of LSSS |
| **Service provision** | Not practical |

### **Table S13. Identification of BCTs based on the intervention functions identified in SR_Table S11**

| **Intervention function** | **Most relevant BCTs** | **Does the BCT meet the APEASE criteria (affordability, practicability, effectiveness/ cost-effectiveness, acceptability, side-effects/safety, equity)?** |
| --- | --- | --- |
| **Education** | **Information about health consequences** | Yes |
| **Feedback on behavior** | Yes |
| **Feedback on outcome(s) of the behavior** | Yes |
| **Prompts/cues** | Yes |
| **Self-monitoring of behavior** | Not likely to be effective in the context of buy and use LSSS since this BCT is usually used to change behavioral habits |
| **Information about antecedents’** | Yes |
| **Environmental restructuring** | **Prompts/cues** | Yes, provided by family physician |
| **Restructuring the physical environment** | Not affordable and practicable in the current resource setting. |
| **Enablement** | **Social support (practical)** | Yes |
| **Goal setting (behavior)** | Not applicable/acceptable because the goal is already very clear |
| **Action planning** | Not applicable/acceptable |
| **Review behavior goal(s)** | Not applicable/acceptable |
| **Selected BCTs:** | Information about health consequences, feedbacks on the outcome of the behaviors, prompt/cues, social support | |

### **Table S14. Outline of the intervention strategy based on the identified intervention functions, policy categories and BCTs for salt reduction.**

| **Intervention functions** | **COM-B components served by intervention functions** | **BCTs to deliver intervention functions** | **Policy categories through which BCTs can be delivered** | **Intervention strategy** |
| --- | --- | --- | --- | --- |
| Education | Psychological capability, reflective motivation | Information about health consequences | Communication/marketing  Regulation  Service provision | Use multiple methods, such as promoting the health benefits of low-sodium salt substitute through family physicians, their assistants, and community outreach, to address common misconceptions and explain the impact of high salt intake on chronic diseases.  For family physicians, include guidance on the use of low-sodium salt substitute as part of their job requirements. |
| Feedback on outcome(s) of the behavior | Regulation  Service provision | Provide regular feedback on blood pressure changes and emphasize the importance of a low-salt/sodium diet. |
| Prompts/cues | Communication/marketing  Regulation  Service provision | For patients who are eligible to use but have not yet started using low-sodium salt substitute, family physician assistants can remind them to try purchasing and using it. |
| Environmental restructuring | Social opportunity | Prompts/cues | Regulation | Highlight low-sodium salt substitute as a key intervention in the routine lifestyle guidance provided by family physicians, motivating them to implement it through performance-based goals and job regulations. |
| Enablement | Psychological capability, social opportunity | Social support (practical) | Environmental/Social planning | Provide photos and purchase information of common low-sodium salt brands in the market to help elderly individuals who may not be literate in selecting low-sodium salt.  For patients who are unable to purchase salt themselves or are not responsible for grocery shopping in their household, have family physician assistants remind family members to assist in purchasing low-sodium salt. |

## **Physical Activity_BCW Table**

### **Table S15. Selection of the target behavior**

| **Potential target behaviors** | **Impact of behavior change** | **Likelihood of changing behavior** | **Spillover score** | **Measurement score** |
| --- | --- | --- | --- | --- |
| Engage in moderate physical activity (e.g., 30 minutes daily) | Very promising | Promising | Very promising | Promising |
| Set specific physical activity goals (e.g., frequency, duration) | Promising | Worth considering | Very promising | Promising |
| Self-monitor daily steps or activity levels with a fitness tracker | Worth considering | Unpromising | Promising | Worth considering |
| Participate in group exercise sessions (e.g., community classes) | Worth considering | Worth considering | Worth considering | Worth considering |
| Avoid prolonged sedentary behavior (e.g., sitting for >1 hour) | Worth considering | Unpromising | Worth considering | Unacceptable |
| Choose active transport options (e.g., walking or cycling) | Promising | Worth considering | Worth considering | Worth considering |
| **Selected target behavior:** | Engaging in regular moderate-intensity physical activity for at least 150 minutes weekly | | | |

Criteria for consider each potential target behaviors: unacceptable, unpromising but worth considering, promising, very promising

### **Table S16. Specification of the target behavior**

| **Target behavior** | Engaging in moderate physical activity (e.g., 150 minutes per week) |
| --- | --- |
| ***Who* needs to perform the behavior?** | Elderly people with hypertension and diabetes in Kunshan |
| ***What* do they need to do differently to achieve the desired change?** | 1. Understand the health benefits of regular physical activity – Capability (C) 2. Overcome barriers to engaging in physical activity (e.g., lack of motivation, fear of injury) – Motivation (M) 3. Identify and access safe, convenient locations for physical activity – Opportunity (O) 4. Build a routine or habit to incorporate physical activity into daily life – Motivation (M) |
| ***When* do they need to do it?** | Incorporate physical activity into their daily routine, such as a 30-minute session every morning or evening or 150 minutes per week |
| ***Where* do they need to do it?** | At home, nearby parks, community centers, or safe walking paths accessible from their homes. |
| ***How often* do they need to do it?** | At least 30 minutes daily or 150 minutes weekly of moderate physical activity |
| ***With whom* do they need to do it?** | Alone or with family, friends, or in a group setting for social support. Group activities or walking buddies can also encourage consistency. |

### **Table S17. Identification of drivers to achieve target behaviors using the COM-B model**

| **COM-B Components** | **What needs to happen for the target behavior to occur?** | **Is there a need for change?** |
| --- | --- | --- |
| **Physical capability** | Have the physical ability to perform moderate activities, such as walking or light exercises. | No. |
| **Psychological capability** | Understand the health benefits of regular physical activity for managing hypertension and diabetes. | Yes. |
| **Physical opportunity** | Access to safe, accessible areas or facilities (e.g., parks, community centers) for physical activity. | Yes. |
| **Social opportunity** | Support from family, friends, or community members to encourage or join in physical activities | Yes. |
| **Reflective motivation** | Willing to change current sedentary habits and incorporate physical activity into their daily routine. | Yes. |
| **Automatic motivation** | Not applicable | No. |
| **Behavioral diagnosis of the relevant COM-B components:** | Psychological capability, physical opportunity, social opportunity, reflective motivation. | |

### **Table S18. Identification of the intervention functions based on the behavioral diagnosis arrived at in PA_Table S17**

| **Candidate intervention functions** | **Does the intervention function meet the APEASE criteria (affordability, practicability, effectiveness/ cost-effectiveness, acceptability, side-effects/safety, equity)?** |
| --- | --- |
| **Education** | Yes. **Equity** – Consider providing visual and verbal educational materials (not just text-based) to accommodate illiteracy. **Effectiveness** – may be limited if education is the sole intervention, so should be combined with other strategies. |
| **Persuasion** | Not cost-effectiveness |
| **Incentivization** | Not applicable due to demands on resources |
| **Coercion** | Not acceptable |
| **Training** | Not practical as there are not sufficient resources to train all the elderly people. |
| **Restriction** | Not acceptable |
| **Environmental restructuring** | Yes. Consider modifying family physician services to provide counseling services and regular feedback on patient’s progress. |
| **Modelling** | Yes. Organizing group exercise sessions or using videos showcasing elderly individuals performing safe and achievable exercises. This can help build confidence and motivate individuals to engage in physical activity. |
| **Enablement** | Yes. Enable |
| **Selected intervention functions** | Education, Environmental, Restructuring Modelling, Enablement |

### **Table S19. Identification of policy categories based on the intervention functions identified in PA_Table S18**

| **Intervention function** | **Policy categories** | **Does the policy category meet the APEASE criteria (affordability, practicability, effectiveness/cost effectiveness, acceptability, side effects/safety, equity)?** |
| --- | --- | --- |
| **Education** | **Communication/ marketing** | Yes |
| **Guidelines** | Unlikely to change in our current study |
| **Regulation** | Yes – in terms of routine practice of FP |
| **Legislation** | No |
| **Service provision** | Yes |
| **Modelling** | **Communication/ marketing** | Yes – Using peer models in promotional materials (e.g., videos of elderly individuals exercising) can encourage others. |
| **Service provision** | Yes – Community health volunteers or peer leaders could serve as role models but may not apply universally. |
| **Environmental restructuring** | **Guidelines** | Unlikely to change in our current study |
| **Fiscal measures** | Not affordable |
| **Regulation** | Yes – requiring family physician to provide physical activity guidance during follow-up visits |
| **Legislation** | Not applicable |
| **Environmental/social planning** | Not applicable |
| **Enablement** | **Guidelines** | Not practical on a large scale, but could provide general tips on physical activity. |
| **Fiscal measures** | Unaffordable |
| **Regulation** | Not applicable |
| **Legislation** | Not applicable |
| **Environmental/social planning** | Yes – identifying accessible pathways and providing transportation options for elderly individuals to reach activity locations. |
| **Service provision** | Yes |

### **Table S20. Identification of BCTs based on the intervention functions identified in PA_Table S18**

| **Intervention function** | **Relevant BCTs** | **Does the BCT meet the APEASE criteria (affordability, practicability, effectiveness/ cost-effectiveness, acceptability, side-effects/safety, equity)?** |
| --- | --- | --- |
| **Education** | **Information about health consequences** | Yes, educating about the health benefits of physical activity, like reducing risks of chronic diseases, is effective and acceptable. |
| **Feedback on behavior** | No, due to the practicability of the design |
| **Feedback on outcome(s) of the behavior** | Yes |
| **Environmental restructuring** | **Prompts/cues** | Yes, remind family physicians |
| **Modeling** | **Demonstration of the behavior** | Yes, demonstrating physical activities in community events or online platforms is effective and affordable. |
| **Enablement** | **Social support (practical)** | Yes, providing guidance or companionship for physical activity is affordable and effective. |
| **Action planning** | Yes, creating plans for regular exercise is effective and widely acceptable. |
| **Selected BCTs** | **Information about health consequences, Prompt/cues, Feedback on outcome(s) of the behavior, demonstration of the behavior, social support (practical), Action planning** | |

### **Table S21. Outline of the intervention strategy based on the identified intervention functions, policy categories and BCTs for physical activity.**

| **Intervention functions** | **COM-B components served by intervention functions** | **BCTs to deliver intervention functions** | **Policy categories through which BCTs can be delivered** | **Intervention strategy** |
| --- | --- | --- | --- | --- |
| Education | Psychological capability, reflective motivation | Information about health consequences | Communication/marketing  Service provision | Use multiple methods, such as educating patients on the benefits of physical activity through family physicians, their assistants, and community outreach. Address common misconceptions and explain how regular physical activity can reduce risks of chronic diseases. |
| Feedback on outcome(s) of the behavior | Service provision  Communication/marketing | Provide regular feedback on patients’ progress in physical activity, such as improvements in strength, flexibility, or mood, and emphasize the importance of continued engagement. |
| Environmental restructuring | Physical opportunity, social opportunity | Prompts/cues | Regulation | Establishing work requirements to provide physical activity guidance as a key component of lifestyle guidance during follow-up visits. |
| Enablement | Psychological capability, social opportunity | Action planning | Service provision | Using Clinical Decision Support System (CDSS) prescribe patients physical exercise plan during family physician consultation |
| Action Planning | Environmental/Social planning | Provide photos,  maps, and  schedules for  local exercise  classes, parks, or  walking paths to  help elderly  individuals and  others identify  accessible  physical activity  options. |
| Social support (practical) | Environmental/Social planning | Family physicians can provide reminders for caregivers to support and assist the patients’ physical activity. |
| Modeling | Reflective motivation, social opportunity | Demonstration of the behavior | Communication/marketing, Service provision | Consult geriatric exercise specialists to provide demonstrations on recommended physical exercises.  Create promotional videos showing elderly individuals performing safe and achievable exercises. Additionally, organize community exercise events where role models can guide and inspire others to participate. |

## **Glossary of Technical Terms in BCW**

This section provides an overview of key terms and frameworks outlined in *The Behaviour Change Wheel: A Guide to Designing Interventions* by Susan Michie, Lou Atkins, and Robert West (2014). The definitions and examples reflect the professional language and rigor required for understanding and applying the Behaviour Change Wheel (BCW) framework.

**1. Unacceptable, Unpromising but Worth Considering, Promising, Very Promising**

These terms are used to assess the feasibility and effectiveness of behavior change interventions:

- **Unacceptable**: An intervention that is ethically, socially, or practically unacceptable. It may cause harm to the target population or stakeholders and therefore should not be considered for implementation.
- **Unpromising but Worth Considering**: An intervention with limited initial effectiveness or feasibility but still holds some potential. It may require further evaluation or testing before making a final decision.
- **Promising**: An intervention that shows positive effects and potential for behavior change. It is suitable for further development or application, though some adjustments or improvements may still be needed.
- **Very Promising**: An intervention that has been preliminarily validated and shows significant effectiveness, with high potential for success. It is suitable for rapid implementation or scale-up.

**2. COM-B Components**

The COM-B model is the core framework in the Behaviour Change Wheel, aimed at identifying and analyzing the key factors influencing behavior. It consists of three interrelated components: capability, opportunity, and motivation. Below are definitions and examples of subsets of each components.

| **COM-B model component**  Definition | ***Example*** |
| --- | --- |
| **Physical capability**  Physical skill, strength or stamina | *Having the skill to take a blood sample* |
| **Psychological capability**  Knowledge or psychological skills, strength or stamina to engage in the necessary mental processes | *Understanding the impact of CO2 on the environment* |
| **Physical opportunity**  Opportunity afforded by the environment involving time, resources, locations, cues, physical ‘affordance’ | *Being able to go running because one owns appropriate shoes* |
| **Social opportunity**  Opportunity afforded by interpersonal influences, social cues and cultural norms that influence the way that we think about things, e.g. the words and concepts that make up our language | *Being able to smoke in the house of someone who smokes but not in the*  *middle of a boardroom meeting* |
| **Reflective motivation**  Reflective processes involving plans (self-conscious intentions) and evaluations (beliefs about what is good and bad) | *Intending to stop smoking* |
| **Automatic motivation**  Automatic processes involving emotional reactions, desires (wants and needs), impulses, inhibitions, drive states and reflex responses | *Feeling anticipated pleasure at the prospect of eating a piece of chocolate cake* |

**3. APEASE Criteria**

The APEASE criteria are used to assess and select behavior change intervention strategies. They help decision-makers evaluate different factors when designing an intervention. APEASE stands for the following six key criteria:

**Table A1. The APEASE Criteria for Designing and Evaluating Interventions**

| **Criterion** | **Description** |
| --- | --- |
| **Affordability** | Interventions must be affordable within the available budget and accessible to all relevant stakeholders. |
| **Practicability** | An intervention must be feasible in practice, delivered as designed to the target population in routine settings. |
| **Effectiveness and Cost-Effectiveness** | Effectiveness refers to achieving desired outcomes in real-world contexts, while cost-effectiveness balances outcomes against financial costs. |
| **Acceptability** | Interventions must align with the values and expectations of stakeholders, including public, professional, and political perspectives. |
| **Side-Effects/Safety** | Interventions should minimize unintended negative consequences while maximizing safety for the target population. |
| **Equity** | Interventions should reduce disparities in health, well-being, and access to resources across different groups within the population. |

Source: Adapted from *The Behaviour Change Wheel: A Guide to Designing Interventions* (Michie, Atkins, & West, 2014).

**4. Policy Categories**

Policy categories describe the broad strategies used by governments or organizations to promote behavior change through environmental, legal, and social measures.

**Table A2. BCW Policy Categories**

| **Policy Category** | **Definition** | **Example** |
| --- | --- | --- |
| **Communication/marketing** | Using print, electronic, telephonic, or broadcast media | Conducting mass media campaigns |
| **Guidelines** | Creating documents that recommend or mandate practice. This includes all changes to service provision | Producing and disseminating treatment protocols |
| **Fiscal measures** | Using the tax system to reduce or increase the financial cost | Increasing duty or increasing anti-smuggling activities |
| **Regulation** | Establishing rules or principles of behavior or practice | Establishing voluntary agreements on advertising |
| **Legislation** | Making or changing laws | Prohibiting sale or use |
| **Environmental/social planning** | Designing and/or controlling the physical or social environment | Using town planning |
| **Service provision** | Delivering a service | Establishing support services in workplaces, communities, etc. |

Source: Adapted from *The Behaviour Change Wheel: A Guide to Designing Interventions* (Michie, Atkins, & West, 2014).

**5. Intervention Functions**

Intervention functions describe the specific approaches used to influence behavior through the BCW framework. These include:

- **Education**: Providing information to increase knowledge and awareness about the behavior and its consequences, motivating individuals to change.
- **Persuasion**: Using emotional, social, or psychological strategies to change attitudes, beliefs, or feelings toward a behavior, making it more attractive.
- **Incentivisation**: Offering rewards or incentives to encourage certain behaviors.
- **Coercion**: Using forceful methods, such as penalties or restrictions, to discourage undesirable behaviors.
- **Training**: Teaching individuals the skills necessary to perform a behavior.
- **Environmental Restructuring**: Changing the physical or social environment to make behavior easier to perform (e.g., providing better access to resources or creating supportive settings).
- **Modelling**: Using role models or demonstrations to encourage others to adopt the behavior.

**6. BCTs (Behavior Change Techniques)**

Behavior Change Techniques (BCTs) are the specific, evidence-based methods or steps used to implement behavior change interventions. BCTs are concrete actions that target the mechanisms of behavior change and are the building blocks of interventions.

| **BCTs mentioned in paper** | **Definition** |
| --- | --- |
| **Information about health consequences** | Provide information *(e.g. written, verbal, visual)* about health consequences of performing the behaviour. |
| **Feedback on behavior** | Monitor and provide informative or evaluative feedback on performance of the behaviour *(e.g. form, frequency, duration, intensity).* |
| **Feedback on outcome(s) of the behavior** | Monitor and provide feedback on the outcome of performance of the behaviour. |
| **Prompts/cues** | Introduce or define environmental or social stimulus with  the purpose of prompting or cueing the behaviour. The prompt or cue would normally occur at the time or place of performance. |
| **Demonstration of the behavior** | Provide an observable sample of the performance of the behaviour, directly in person or indirectly e.g. via film, pictures, for the person to aspire to or imitate (includes *‘****Modelling****’*). |
| **Action planning** | Prompt detailed planning of performance of the behaviour (must include at least one of context, frequency, duration and intensity). Context may be environmental (physical or social) or internal (physical, emotional or cognitive) (includes***‘Implementation Intentions’***). |
| **Adding objects to the environment** | Add objects to the environment in order to facilitate performance of the behaviour. |
| **Social support (unspecified)** | Advise on, arrange or provide social support *(e.g. from friends, relatives, colleagues, ‘buddies’ or staff)* or non-con-tingent praise or reward for performance of the behaviour. It includes encouragement and counselling, but only when it is directed at the **behaviour** |
| **Goal setting (behavior)** | Set or agree a goal defined in terms of a positive **outcome** of wanted behaviour. |
| **Self-monitoring of behavior** | Establish a method for the person to monitor and record their behaviour(s) as part of a behaviour change strategy. |
| **Information about antecedents** | Provide information about antecedents *(e.g. social and environmental situations and events, emotions, cognitions)* that reliably predict performance of the behaviour. |
| **Restructuring the physical environment** | Change, or advise to change the physical environment in order to facilitate performance of the wanted behaviour or create barriers to the unwanted behaviour (other than prompts/cues, rewards and punishments). |
| **Social support (practical)** | Advise on, arrange, or provide practical help *(e.g. from friends, relatives, colleagues, ‘buddies’ or staff)* for performance of the behaviour |
| **Review behavior goal(s)** | eview behaviour goal(s) jointly with the person and consider  modifying goal(s) or behaviour change strategy in light of  achievement. This may lead to re-setting the same goal, a small change in that goal or setting a new goal instead of (or in addition to) the first, or no change. |

**References**

Michie, S., Atkins, L., & West, R. (2014). *The Behaviour Change Wheel: A Guide to Designing Interventions*. Silverback Publishing.

Michie S, Richardson M, Johnston M, et al. (2013) The Behavior Change Technique Taxonomy (v1) of 93 Hierarchically Clustered Techniques: Building an International Consensus for the Reporting of Behavior Change Interventions. *Annals of Behavioral Medicine.* 46(1):81-95. doi:10.1007/s12160-013-9486-6
